# Supplementary material for: A health technology assessment based on Chinese guideline: Carbapenems in the treatment of intra-abdominal infection
Source: Research Square preprint supplement (doi:10.21203/rs.3.rs-8247621/v1), 2026-01-30
Supplement: Supplementary file 1 [file f9c5685f7cc4245a1b988e70.docx]

**Table 1: Drugs included in the evaluation**

|  | imipenem-cilastatin | meropenem | biapenem | ertapenem |
| --- | --- | --- | --- | --- |
| trade name | Tienam;  PRIMAXIN | Mepem | TIANCE | INVANZ |
| manufacturer | Merck Sharp & Dohme Group | Sumitomo Pharma Co., Ltd. Oita Plant | Chia Tai Tianqing Pharmaceutical Group Co., Ltd. | Merck Sharp & Dohme Group |
| Specification | (500mg/500mg)*1 | 0.5g*10 | 0.3g*1 | 1g*1 |

**Table 2. Pharmaceutical properties score results**

| pharmaceutical properties (28 points) | | Grading Criteria | imipenem-cilastatin | meropenem | biapenem | ertapenem |
| --- | --- | --- | --- | --- | --- | --- |
| pharmacological effects  (5) | Definite clinical efficacy, precise mechanism of action, and innovative mechanism of action or target point of action | 5 |  |  |  |  |
| Definite clinical efficacy and precise mechanism of action | 4 | 4 | 4 | 4 | 4 |
| Fair clinical efficacy and mechanism of action are unclear | 2 |  |  |  |  |
| General clinical efficacy and unclear mechanism of action | 1 |  |  |  |  |
| In vivo processes  (5) | Well-defined in vivo process with complete pharmacokinetic parameters | 5 | 5 | 5 | 5 | 5 |
| Well-defined in vivo process with incomplete pharmacokinetic parameters | 3 |  |  |  |  |
| In vivo processes are unclear, or no pharmacokinetic studies are available | 1 |  |  |  |  |
| Pharmacy and methods of use  (multiple choice) (12) | Main ingredients and excipients (all specify 2; one specify 1) | 2 | 2 | 2 | 1 | 2 |
| Specification and packaging (all appropriate for clinical use/dose adjustment 2; one appropriate 1) | 2 | 2 | 2 | 2 | 2 |
| Dosage forms (oral/inhalation/topical formulations 2; subcutaneous/intramuscular injections 1.5; intravenous drip/intravenous injections 1) | 2 | 1 | 1 | 1 | 1.5 |
| The dose administered (fixed dose 2; dose to be adjusted during use 1.5; dose based on body mass or body surface area 1) | 2 | 1.5 | 1.5 | 1.5 | 1.5 |
| Frequency of administration (<1 dose/d 2; 2 doses/d 1.5; ≥3 doses/d 1) | 2 | 1 | 1 | 1.5 | 2 |
| Ease of use (self-administration without assistance 2; with help or training 1.5; administered by medical personnel 1) | 2 | 1 | 1 | 1 | 1 |
| Storage conditions  (multiple choice)(4) | Storage at room temperature | 3 | 3 | 3 | 3 | 3 |
| Storage in the shade | 2 |  |  |  |  |
| Refrigerated/frozen storage | 1 |  |  |  |  |
| No need for shade/light protection | 1 | 1 | 1 |  | 1 |
| Expiry date (2) | >60 months | 2 |  |  |  |  |
| ≥36 months, <60 months | 1.5 |  | 1.5 |  |  |
| ≥24 months, <36 months | 1 | 1 |  | 1 | 1 |
| ≥12 person-months, <24 months | 0.5 |  |  |  |  |
| <12 months | 0.25 |  |  |  |  |
| Pharmaceutical Properties Score | |  | 22.5 | 23 | 21 | 24 |

| **Table 3. Recommendations from national and international guidelines/consensus** | | | |
| --- | --- | --- | --- |
| Name of the guidelines | Guide developers and sources | Name of drug | Recommended content |
| Infectious Diseases Society of America 2023 Guidance on the Treatment of Antimicrobial Resistant Gram-Negative Infections | Infectious Diseases Society of America（IDSA） | Meropenem, imipenem-cilastatin, ertapenem | Meropenem, imipenem-cilastatin, or ertapenem are preferred for the treatment of infections outside of the urinary tract caused by ESBL-E. For patients who are critically ill and/or experiencing hypoalbuminemia, meropenem or imipenem-cilastatin are the preferred carbapenems. |
| The Surgical Infection Society Revised Guidelines on the Management of Intra-Abdominal Infection | Surgical Infection Society (SIS) | Ertapenem,  imipenem-cilastatin, meropenem | Use ertapenem for empiric therapy of lower-risk adults and children (Grade 1-A).  Use imipenem-cilastatin or meropenem for the empiric therapy of adults and children (Grade 1-A), but reserve these agents primarily for higher-risk patients because of their broader-spectrum antimicrobial activity (Grade 2-C).  Consider use of a broad-spectrum carbapenem, or ceftolozane-tazobactam or ceftazidime-avibactam as alternatives, for empiric therapy of patients at risk for infection with ESBL-producing Enterobacteriaceae (Grade 2-B). |
| WSES/GAIS/SIS-E/WSIS/AAST global clinical pathways for patients with intra-abdominal infections | Emergency Surgery (WSES), the Global Alliance for Infections in Surgery (GAIS), the Surgical Infection Society-Europe (SIS-E), the World Surgical Infection Society (WSIS), and the American Association for the Surgery of Trauma (AAST) | Ertapenem, Meropenem,  Imipenem/cilastatin | In patients at high risk for infection with community-acquired ESBL-producing Enterobacteriaceae:  Ertapenem 1 g every 24 h (not active against Pseudomonas aeruginosa); Meropenem 1 g every 8 h (only in patients with septic shock);  Doripenem 500 mg every 8 h (only in patients with septic shock); Imipenem/cilastatin 500 mg every 6 h (only patients with septic shock). |
| Korean Guidelines for Use of Antibiotics for Intra-abdominal Infections in Adults | Korean Society for Antimicrobial Therapy and Korean Society of Infectious Diseases | meropenem, imipenem | Empirical antibiotic treatment with carbapenems (such as meropenem, imipenem, and doripenem) is generally not recommended and used for specific treatment after identification of the causative organism (quality of evidence at moderate, strength of recommendation at weak). |
| Diagnosis and Management of Intraabdominal Infection: Guidelines by the Chinese Society of Surgical Infection and Intensive Care and the Chinese College of Gastrointestinal Fistula Surgeons | the Chinese Society of Surgical Infection and Intensive Care  and the Chinese College of Gastrointestinal Fistula Surgeons | Ertapenem, Meropenem,  Imipenem/cilastatin | For patients with mild to moderate CA-IAI, the recommended antimicrobial regimens of empiric single-agent therapy are moxifloxacin, cefoperazone-sulbactam, and ertapenem (strong recommendation, moderate quality of evidence)  For patients with severe CA-IAI, the recommended antimicrobial regimens of empiric single-agent therapy are carbapenems, including imipenem-cilastatin and meropenem, or piperacillin-tazobactam (strong recommendation, moderate quality of evidence) |
| Chinese guideline for the diagnosis and management of intra- abdominal infection (2019 edition) | Chinese Society of Surgical Infection and Intensive Care, Chinese Society of Surgery, Chinese Medical Association; Chinese College of Gastrointestinal Fistula Surgeons, Chinese College of Surgeons, Chinese Medical Doctor Association | Ertapenem, Meropenem,  Imipenem/cilastatin,  biapenem | (1) For mild to moderate CA-IAI patients, moxifloxacin, cefoperazone-sulbactam, ertapenem are recommended as single agents for empiric anti-infective therapy (medium quality evidence, strongly recommended).  (2) For patients with severe CA-IAI, carbapenems such as imipenem-cilastatin, meropenem, or piperacillin- tazobactam are recommended as single agents for empirical anti-infective therapy (medium quality evidence, strongly recommended).  (3) Carbapenems should be selected if patients are at risk of infection with ESBL pathogens. |
| Consensus of Chinese experts on emergency diagnosis and treatment of extended-spectrum β-lactamase-producing Enterobacteriaceae infection | Chinese expert consensus group on emergency diagnosis and treatment of extended-spectrum β-lactamase-producing Enterobacteriaceae infection | Ertapenem, Meropenem,  Imipenem/cilastatin, biapenem | 1. Abdominal infection: Hospital acquired abdominal infection has a higher incidence of ESBL-E. For mild and moderate community-acquired ESBL-E abdominal infection, monotherapy can be selected, and piperacillin/tazobactam, amikacin or ertapenem are recommended. Carbapenems should be selected for severe community-acquired and hospital-acquired ESBL-E abdominal infection.  2. Carbapenems are the most effective antimicrobials for ESBL-E infection, and commonly used drugs include imipenem/cilastatin, ertapenem, meropenem, Panipenem/betamilone, biapenem, etc. Carbapenems are preferred in patients with acute or progressive ESBL-E infection with severe infections such as acute or progressive organ dysfunction, hemodynamic changes, and mechanical ventilation support. |

**NOTE:** “broad-spectrum carbapenem” which mention in the content is referring to doripenem, imipenem-cilastatin, and meropenem; “carbapenems”

which mention in the content is referring to doripenem, imipenem-cilastatin, meropenem, biapenem and ertapenem.

**Table 4. Scored of primary efficacy endpoint indicators**

| classification of IAI | | score |
| --- | --- | --- |
| CA-IAI  (3 points) | mild to moderate  (1.5 points) | ertapenem(1.5 points)>meropenem、imipenem-cilastatin(1 point)>biapenem(0.5 points) |
| severe  (1.5points) | meropenem、imipenem-cilastatin(1.5 points)>biapenem(1 point)>ertapenem(0.5 points) |
| HA-IAI  (3 points) | / | meropenem、imipenem-cilastatin(3 points)>biapenem(2.5 points)>ertapenem(2 points) |

**Table 5. efficacy score results**

| Efficacy (27 points) | | Grading Criteria | imipenem-cilastatin | meropenem | biapenem | ertapenem |
| --- | --- | --- | --- | --- | --- | --- |
| Indications(5) | Clinically necessary, preferred | 5 | 5 | 5 | 5 | 3 |
| Clinical need, second choice | 3 |  |  |  |  |
| More medicines available | 1 |  |  |  |  |
| Recommended Guidelines (12) | Diagnosis and treatment norms/clinical pathways, consensus issued by national health administrative agencies/management methods, etc., guideline level I recommendation (Level A evidence 12; Level B evidence 11; Level C evidence, and others 10) | 12 | 12 | 12 |  | 12 |
| Guidelines Level II and below (Level A Evidence 9; Level B Evidence 8; Level C Evidence and Others 7) | 9 |  |  | 7 |  |
| Expert Consensus Recommendations (the consensus published by the society organizations based on systematic evaluation 6; the consensus published by the society organization others 4) | 6 |  |  |  |  |
| Systematic evaluation/Meta-analysis (large sample, high-quality systematic evaluation/Meta-analysis 3; small sample, low-quality systematic evaluation/Meta-analysis 2; systematic evaluation/Meta-analysis of non-RCT studies 1). | 3 |  |  |  |  |
| Clinical efficacy (10) | The primary efficacy endpoint indicators (6) | 6 | 5.5 | 5.5 | 4 | 4 |
| The secondary efficacy endpoint indicators (4) | 4 | 2 | 3 | 4 | 4 |
| Efficacy Score | |  | 24.5 | 25.5 | 20 | 23 |

**Table 6. Safety score results**

| Safety (25 points) | | Grading Criteria | imipenem-cilastatin | meropenem | biapenem | ertapenem |
| --- | --- | --- | --- | --- | --- | --- |
| Moderate adverse reactions (3) | Incidence <1% | 3 |  | 3 | 3 |  |
| Incidence 1% to <10% | 2 | 2 |  |  | 2 |
| Incidence ≥10% | 1 |  |  |  |  |
| ADR occurrence data not available | 0 |  |  |  |  |
| Severe adverse reactions (5) | Incidence < 0.01% | 5 |  |  |  |  |
| Incidence 0.01%~<0.1% | 4 |  | 4 |  |  |
| Incidence 0.1%~<1% | 3 | 3 |  | 3 | 3 |
| Incidence 1% to <10% | 2 |  |  |  |  |
| Incidence ≥10% | 1 |  |  |  |  |
| ADR occurrence data not available | 0 |  |  |  |  |
| Special populations (multiple choice) (11) | Available for children (both 2; 1.9 for 3 months+; 1.8 for 6 months+; 1.7 for 9 months+; 1.6 for ages 1+; 1.5 for ages 2+; 1.4 for ages 3+; 1.3 for ages 4+; 1.2 for ages 5+; 1.1 for ages 6+; 1.0 for ages 7+; 0.9 for ages 8+; 0.8 for ages 9+ 0.7 for ages 10+; 0.6 for ages 11+; 0.5 for ages 12+. | 2 | 2 | 2 | 0 | 1.9 |
| The elderly (available 1; use with caution 0.5) | 1 | 1 | 1 | 0.5 | 1 |
| Pregnant women (early pregnancy 1;  during the first trimester 0.8; during the second trimester 0.5). | 1 | 0.5 | 0.8 | 0.5 | 0.8 |
| Lactating women (available 1; use with caution 0.5) | 1 | 0.5 | 0.5 | 0.5 | 0.5 |
| Hepatic dysfunction (severe available 3, moderate available 2.  Lightly available 1) | 3 | 3 | 3 | 3 | 3 |
| Renal dysfunction (severe available 3, moderate available 2.  Lightly available 1) | 3 | 3 | 3 | 3 | 3 |
| Adverse reactions due to drug interactions (3) | No dosage adjustment is required | 3 |  |  |  |  |
| Dosage adjustment required | 2 |  |  |  |  |
| Prohibited to use at the same time | 1 | 1 | 1 | 1 | 1 |
| Other (multiple choice) (3) | Reversibility of adverse reactions | 1 | 0.5 | 0.5 | 0.5 | 0.5 |
| Non-teratogenic/ non-carcinogenic | 1 | 1 | 1 | 1 | 1 |
| No special medication warnings | 1 | 1 | 1 | 1 | 0.5 |
| Total Safety Score | |  | 18.5 | 20.5 | 14 | 17.9 |

**Table 7. Basic Economy Information**

|  | imipenem-cilastatin | meropenem | biapenem | ertapenem |
| --- | --- | --- | --- | --- |
| Specification | (500mg/500mg)*1 | 0.5g*10 | 0.3g*1 | 1g*1 |
| Dosage | (500mg/500mg), q6h~(500mg/500mg)*2, q6h | 0.5g,q8~2g,q8 | 0.6g, bid | 1g, qd |
| Average daily cost of treatment(¥) | 755.52 | 820.88 | 50.32 | 289.25 |
| the lowest average daily cost of treatment among the same generic name (¥) a | 293.4 | 69.98 | 50.32 | 276 |
| the lowest average daily cost of Substitutable Medicines for Main Indications (¥) b | 24.32 | | | |

**Note**: a Carbapenem with the lowest daily treatment cost: Imipenem and Cilastatin Sodium for Injection (Savior Lifetec Corporation Tainan Branch Injection Plant), Meropenem for Injection (PKU HealthCare Corp., Ltd.), biapenem for Injection (Chia Tai Tianqing Pharmaceutical Group Co., Ltd.) Ertapenem Sodium for Injection (CSPC OUYI Pharmaceutical Co., Ltd.). b the lowest average daily cost of Substitutable Medicines for treating IAI: Piperacillin Sodium and Sulbactam Sodium for Injection(4:1)( HApharm Group Co., Ltd.)

**Table 8. Economy Score Results**

| Economy (10 points) | | Grading Criteria | imipenem-cilastatin | meropenem | biapenem | ertapenem |
| --- | --- | --- | --- | --- | --- | --- |
| Drugs with the same generic name(3) | The score for the evaluated drug = lowest average daily cost of treatment/average daily cost of treatment for the evaluated drug * 3 | 3 | 1.17 | 0.26 | 3 | 2.86 |
| Substitutable medicines for main indications (7) | The score for the evaluated drug = lowest average daily cost of treatment / average daily cost of treatment of the evaluated drug * 7. | 7 | 0.23 | 0.21 | 3.38 | 0.59 |
| Economy Score | |  | 1.4 | 0.47 | 6.38 | 3.45 |

**Table 9. Other Attribute Score Results**

| Other attributes (10 points) | | Grading Criteria | imipenem-cilastatin | meropenem | biapenem | ertapenem |
| --- | --- | --- | --- | --- | --- | --- |
| National Medical Insurance (3) | National medical insurance category A, no payment restrictions | 3 |  |  |  |  |
| National medical insurance category A with payment restrictions | 2.5 |  |  |  |  |
| National medical insurance category B, no payment limitations | 2 |  | 2 | 2 |  |
| National medical insurance category B with payment restrictions. | 1.5 | 1.5 |  |  | 1.5 |
| Not on the national medical insurance list | 1 |  |  |  |  |
| National essential drugs (3) | National essential drugs without △requirement. | 3 |  |  |  |  |
| National essential drugs with △Requirements | 2 |  |  |  |  |
| Not on the national essential drugs list | 1 | 1 | 1 | 1 | 1 |
| National centralized procurement of medicines (1) | Selected drugs for centralized national procurement | 1 | 0 | 0 | 1 | 0 |
| Original/reference/consistency evaluation (1) | Drug of origin/reference drug | 1 | 1 | 1 |  | 1 |
| Generic drugs through consistency evaluation | 0.5 |  |  | 0.5 |  |
| Status of producers (1) | The world's top 50 pharmaceutical manufacturers in terms of sales volume(1 for top1-10; 0.8 for top11-20; 0.6 for top21-30; 0.4 for top31-40; 0.2 for top41-50) / Top 100 Pharmaceutical Industry published by MIIT (1for top1-20; 0.8 for top21-40; 0.6 for top41-60; 0.4 for top61-80; 0.2 for top81-100). | 1 | 1 | 0 | 1 | 1 |
| Global utilization (1) | Available in China, USA, Europe, Japan | 1 | 1 |  |  |  |
| Domestic and international sales | 0.5 |  | 0.5 | 0 | 0.5 |
| Other Attributes Score | |  | 5.5 | 4.5 | 5.5 | 5 |

**Note**: The “Δ” sign indicates that the drug should be used by a physician with corresponding prescription qualifications or under the guidance of a specialist physician, and use monitoring and evaluation should be strengthened.

**Table 10. Final Total Score Results**

| Evaluation Dimension | imipenem-cilastatin | meropenem | biapenem | ertapenem |
| --- | --- | --- | --- | --- |
| Pharmaceutical Properties | 22.5 | 23 | 21 | 24 |
| Efficacy | 24.5 | 25.5 | 20 | 23 |
| Safety | 18.5 | 20.8 | 17 | 18.2 |
| Economy | 1.4 | 0.47 | 6.38 | 3.45 |
| Other Attributes | 5.5 | 4.5 | 5.5 | 5 |
| Total Score | 72.4 | 74.27 | 69.88 | 73.65 |
